# Supplementary material for: A novel ICK mutation causes ciliary disruption and lethal endocrine-cerebro-osteodysplasia syndrome
Source: PubMed Central journal article supplement (PMC4827216; doi:10.1186/s13630-016-0029-1), 2016-04-11

**Additional file 6: Figure S4. Ciliary length is not essentially altered in cilia of cells expressing mutant mRFP-ICK.** IMCD3 cells were transiently transfected with wildtype or mutant (p.R272Q or p.G120C) mRFP-ICK and ciliary length was measured after 24 hours serum starvation to induce ciliogenesis. The length of cilia expressing mutant mRFP-ICK is not dramatically altered. The ciliary axoneme, visualized with ARL13B, of at least 28 cilia were measured per condition.

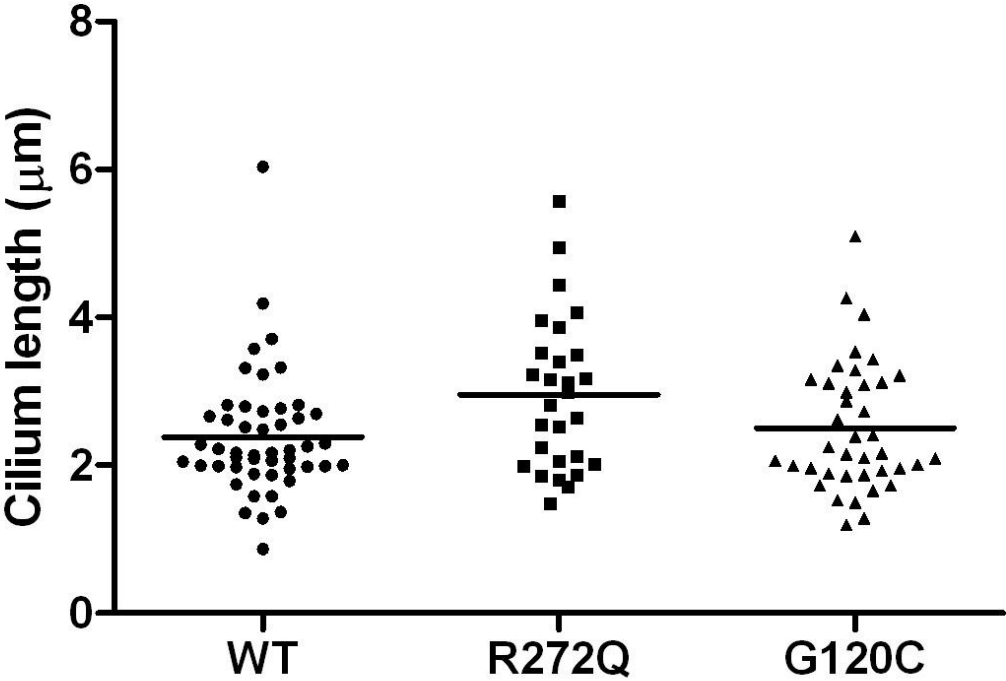

Supplement: 13630_2016_29_MOESM6_ESM.pdf [file 13630_2016_29_MOESM6_ESM.pdf]
